# Supplementary material
Source: MDPI journal article supplement (https://www.mdpi.com/2071-1050/14/4/2144)
Supplement: s1 [file s1]

## ***Supplementary Materials***

### ***Federal Laws***

Constituição Federal do Brasil de 1988

[http://www.planalto.gov.br/ccivil\\_03/constituicao/constituicao.htm](http://www.planalto.gov.br/ccivil_03/constituicao/constituicao.htm)

Estrutura Administrativa da União do Brasil

Lei nº 13.502/2017

<https://www.justica.gov.br/Acesso/institucional/sumario/decretos/anexos/lei-no-13-502-de-10-de-novembro-de-2017/view>

Lei nº 13.844/2019

<https://www.justica.gov.br/Acesso/institucional/sumario/decretos/anexos/lei-no-13-844-de-18-de-junho-de-2019-1.pdf/view>

Lei nº 6.938/1981 – Política Nacional de Meio Ambiente (PNMA)

[http://www.planalto.gov.br/ccivil\\_03/leis/l6938.htm](http://www.planalto.gov.br/ccivil_03/leis/l6938.htm)

Lei nº 9.433/1997 – Política Nacional de Gestão de Recursos Hídricos

[http://www.planalto.gov.br/ccivil\\_03/leis/l9433.htm](http://www.planalto.gov.br/ccivil_03/leis/l9433.htm)

Lei nº 10.257/2001 – Estatuto da Cidade

[http://www.planalto.gov.br/ccivil\\_03/leis/leis\\_2001/l10257.htm](http://www.planalto.gov.br/ccivil_03/leis/leis_2001/l10257.htm)

Lei nº 11.445/2007 – Política Nacional de Saneamento Básico

[http://www.planalto.gov.br/ccivil\\_03/\\_ato2007-2010/2007/lei/l11445.htm](http://www.planalto.gov.br/ccivil_03/_ato2007-2010/2007/lei/l11445.htm)

Lei Complementar nº 140/2011

[http://www.planalto.gov.br/ccivil\\_03/leis/lcp/lcp140.htm](http://www.planalto.gov.br/ccivil_03/leis/lcp/lcp140.htm)

Lei nº 14.026/2020 – Novo Marco Legal do Saneamento Básico

<https://www.in.gov.br/web/dou/-/lei-n-14.026-de-15-de-julho-de-2020-267035421>

Agência Nacional de Águas e Saneamento Básico

[http://www.planalto.gov.br/ccivil\\_03/leis/l9984.htm](http://www.planalto.gov.br/ccivil_03/leis/l9984.htm)

### ***State Laws – Bahia***

Lei nº 11.612/2009 – Política Estadual de Recursos Hídricos

<http://www.seia.ba.gov.br/sites/default/files/legislation/Lei11621.pdf>

Lei nº 11.172/2008 – Política Estadual de Saneamento Básico

[https://www.embasa.ba.gov.br/images/Institucional/legislacaoeregulacao/leis/estaduais/20180808\\_LEI\\_Lei11172de1dedezembrode2008.pdf](https://www.embasa.ba.gov.br/images/Institucional/legislacaoeregulacao/leis/estaduais/20180808_LEI_Lei11172de1dedezembrode2008.pdf)

Lei nº 10.431/2006 – Política Estadual de Meio Ambiente

[http://www.seia.ba.gov.br/sites/default/files/legislation/Lei%2010431\\_2006.pdf](http://www.seia.ba.gov.br/sites/default/files/legislation/Lei%2010431_2006.pdf)

CEPRAM – Resolução nº 4.579/2018 – Licenciamento Ambiental

[http://www.meioambiente.ba.gov.br/gestor/ArquivosSistemas/SistemaPublicacao/Arquivos/4642/RESOLUCAO\\_4.579\\_de\\_06\\_de\\_marco\\_de\\_2018\\_alte.pdf](http://www.meioambiente.ba.gov.br/gestor/ArquivosSistemas/SistemaPublicacao/Arquivos/4642/RESOLUCAO_4.579_de_06_de_marco_de_2018_alte.pdf)

Lei Complementar nº 48/2019 – Institui as Microrregiões de Saneamento Básica da Bahia

<http://www.sih.ba.gov.br/modules/conteudo/conteudo.php?conteudo=28>

Decreto nº 19.337/2019 – Aprova os regimentos internos provisórios das entidades microrregionais das microrregiões de saneamento básico.

<http://www.sih.ba.gov.br/modules/conteudo/conteudo.php?conteudo=29>

Lei Estadual nº 13.214, de 29 de dezembro de 2014, que estabelece a Política de Desenvolvimento Territorial do Estado da Bahia.

<https://seplan.ba.gov.br/arquivos/File/politica-territorial/LEGISLACAO/Lei-13.214-de-29-de-dezembro-2014-Politica-Territorial.pdf>

### ***Municipal Laws – Itabuna***

Lei nº 2.195/2011 – Política Municipal de Meio Ambiente

<http://www.itabuna.ba.gov.br/wp-content/uploads/2021/03/Lei-Ambiental-Municipal-2011.pdf>

Lei nº 2.111/2008 – Plano Diretor (PDDU)

<http://www.itabuna.ba.gov.br/sedur/pddu/>

Lei nº 2.378/2017—Estrutura Administrativa da Prefeitura Municipal de Itabuna  
[http://io.org.br/ba/itabuna/arquivos\\_clientes/353/midia/107841.pdf](http://io.org.br/ba/itabuna/arquivos_clientes/353/midia/107841.pdf)  
Política Municipal de Saneamento Básico  
[https://cmvtabuna.ba.gov.br/portal/wp-content/uploads/2020/06/Projeto\\_de\\_Lei\\_n%C2%BA\\_004-2020-ok.pdf](https://cmvtabuna.ba.gov.br/portal/wp-content/uploads/2020/06/Projeto_de_Lei_n%C2%BA_004-2020-ok.pdf)

### **Websites**

Agência Nacional de Águas e Saneamento Básico  
<https://www.gov.br/ana/pt-br>  
<https://www.gov.br/ana/en/>  
INEMA—<http://www.inema.ba.gov.br/quem-somos-2/institucional/>  
INEMA—Comitê da Bacia Hidrográfica do Leste da Bahia (RPGA VII)  
<http://www.inema.ba.gov.br/gestao-2/comites-de-bacias/comites/cbh-leste/>  
Associação dos Municípios da Região Cacaueira – AMURC  
<https://amurc.com/>  
Terriórios de Identidade do Estado da Bahia  
<http://www.seplan.ba.gov.br/modules/conteudo/conteudo.php?conteudo=17>  
Consórcio de Desenvolvimento Sustentável do Território Litoral Sul  
[https://seplan.ba.gov.br/arquivos/File/politica-territorial/CONSORCIOS-PUBLICOS/Consortorios\\_Existentes\\_e\\_Contatos.pdf](https://seplan.ba.gov.br/arquivos/File/politica-territorial/CONSORCIOS-PUBLICOS/Consortorios_Existentes_e_Contatos.pdf)  
Prefeitura Municipal de Itabuna – Portal da Transparência  
<https://itabuna-ba.portaltp.com.br/>  
Empresa Baiana de Águas e Saneamento S. A. (EMBASA)  
<https://www.embasa.ba.gov.br/index.php/institucional/a-embasa/apresentacao>  
Empresa Municipal de Águas e Saneamento S. A. (EMASA)  
<http://www.emasaitabuna.com.br/site/historia-do-abastecimento-de-agua-em-itabuna/>
